# Supplementary material
Source: HighWire-hosted journal article supplement (https://ijssurgery.com/content/17/6/866)
Supplement: inline-supplementary-material-2 [file inline-supplementary-material-2.docx]

| **Category** | **Model 1 (Unadjusted)** | **p -value** | **Model 2 (Adjusted)** | **p-value** † |
| --- | --- | --- | --- | --- |
| **Malnutrition Status** |  |  |  |  |
| Normal | Ref |  | Ref |  |
| Moderate | 1.547 [1.008 - 2.373] | 0.046 | 1.253 [0.807 - 1.944] | 0.314 |
| Severe | 5.345 [3.858 - 7.404] | < 0.001 | 3.448 [2.402 - 4.948] | **< 0.001** |
| **Age** |  |  |  |  |
| 65-80 | Ref |  | Ref |  |
| 81+ | 1.509 [1.050 - 2.169] | 0.026 | 1.244 [0.850 - 1.820] | 0.262 |
| **BMI** |  |  |  |  |
| Underweight (<18.5kg/m2) | 1.272 [0.457 - 3.540] | 0.645 | 0.622 [0.217 - 1.784] | 0.377 |
| Normal Weight (18.5-24.9 kg/m2) | 1.474 [1.037 - 2.096] | 0.031 | 1.082 [0.745 - 1.572] | 0.678 |
| Overweight (25.0-29.9 kg/m2) | 0.799 [0.553 - 1.155] | 0.233 | 0.776 [0.531 - 1.134] | 0.190 |
| Obese (>30.0 kg/m2) | Ref |  | Ref |  |
| **Race** |  |  |  |  |
| White | Ref |  | Ref |  |
| Black | 1.434 [0.926 - 2.220] | 0.106 | 1.119 [0.708 - 1.767] | 0.630 |
| Hispanic | 1.176 [0.703 - 1.967] | 0.536 | 1.007 [0.593 - 1.709] | 0.979 |
| Other | 1.801 [1.101 - 2.948] | 0.019 | 1.392 [0.834 - 2.321] | 0.206 |
| **Admission Status** |  |  |  |  |
| Outpatient | Ref |  | Ref |  |
| Inpatient | 13.590 [3.368 - 54.847] | < 0.001 | 9.122 [2.249 - 36.999] | **0.002** |
| **Comorbidites** |  |  |  |  |
| Smoking History | 1.253 [0.828 - 1.896] | 0.287 | - | - |
| Diabetes Mellitus | 1.194 [0.870 - 1.640] | 0.273 | - | - |
| CVA/TIA | 1.269 [0.308 - 5.224] | 0.741 | - | - |
| Hemiplegia/Quadraplegia/Paraplegia | 4.234 [1.918 - 9.345] | < 0.001 | 2.237 [0.897 - 5.578] | 0.084 |
| Steroid Use | 1.762 [1.109 - 2.801] | 0.017 | 1.316 [0.801 - 2.160] | 0.278 |
| >10% Weight Loss Within Last 6 Months | 2.698 [1.166 - 6.244] | 0.020 | 1.148 [0.460 - 2.868] | 0.767 |
| Disseminated Cancer | 2.399 [1.345 - 4.282] | 0.003 | 1.359 [0.727 - 2.539] | 0.336 |
| ***Pulmonary Comorbidity*** | 2.561 [1.845 - 3.555] | < 0.001 | - | - |
| Dyspnea | 1.743 [1.116 - 2.720] | 0.015 | 1.383 [0.841 - 2.273] | 0.201 |
| Ventilator Dependent | 16.397 [9.349 - 28.757] | < 0.001 | 6.880 [3.761 - 12.585] | **< 0.001** |
| COPD | 1.952 [1.269 - 3.002] | 0.002 | 1.642 [1.028 - 2.621] | 0.038 |
| ***Cardiac Comorbidity*** | 1.776 [0.862 - 3.662] | 0.120 | - | - |
| CHF | 3.273 [1.495 - 7.168] | 0.003 | 1.438 [0.608 - 3.402] | 0.408 |
| ***Renal Comorbidity*** | 3.861 [1.919 - 7.768] | < 0.001 | - | - |
| On Dialysis | 4.117 [2.042 - 8.297] | < 0.001 | 1.843 [0.858 - 3.957] | 0.117 |
| **Surgical Subspecialty** |  |  |  |  |
| Orthopedic Surgery | Ref |  | Ref |  |
| Neurosurgery | 1.281 [0.907 - 1.810] | 0.160 | - | **-** |
| **Number of Levels** |  |  |  |  |
| Single level | Ref |  | Ref |  |
| Multi-level | 1.196 [0.846 - 1.691] | 0.311 | - | - |

Supplemental Table 2. Univariate and multivariate regression analysis for sepsis/septic shock

†Boldface values are significant at p < 0.017 due to Bonferroni correction.
